# Supplementary material for: Clinicopathologic and molecular analysis of embryonal rhabdomyosarcoma of the genitourinary tract: evidence for a distinct DICER1-associated subgroup
Source: PubMed Central journal article supplement (PMC8295035; doi:10.1038/s41379-021-00804-y), 2021-04-12
Supplement: 41379_2021_804_MOESM1_ESM.pdf [file 41379_2021_804_MOESM1_ESM.pdf]

**Supplementary Figure 1:** Unsupervised hierarchical clustering (a) of 9 *DICER1*-mut and 8 *DICER1*-wt ERMS, (b) together with a large methylation data set of RMS of genitourinary and extra-genitourinary locations shows distinct cluster formation for ARMS (n = 43), *MYOD1*-mut SRMS (n = 12), ERMS (n = 46), non-neoplastic striated muscle tissue (control; n = 8) and *DICER1*-mut ERMS (n = 10).

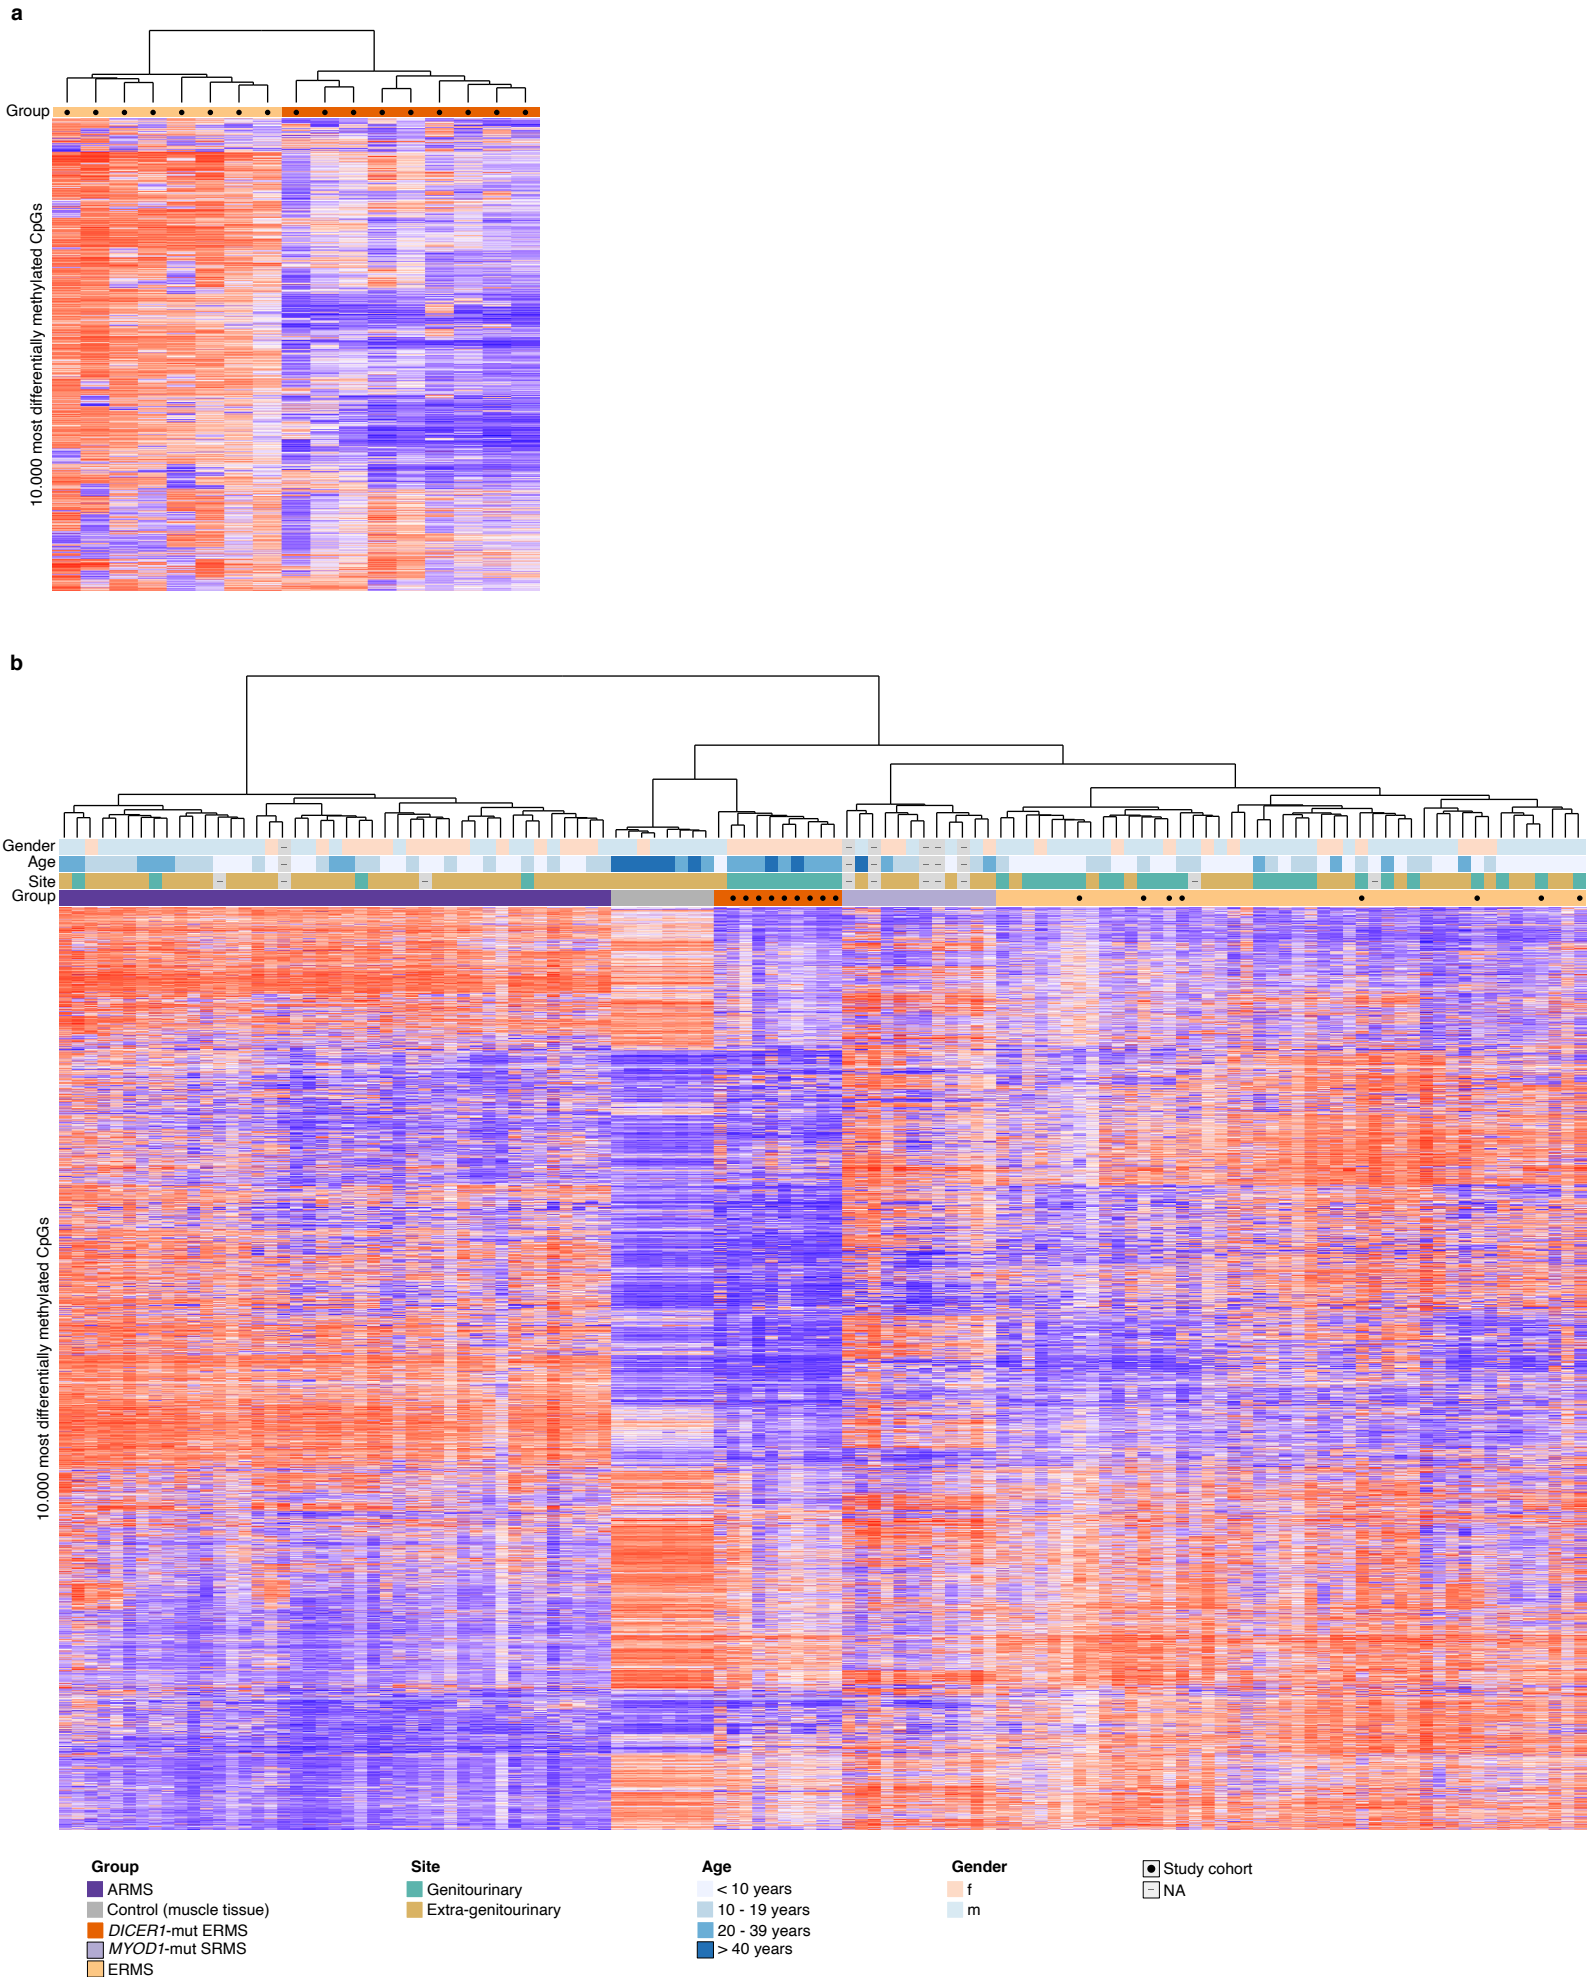

**Supplementary Figure 2:** ERMS arising in the maxillary region of a 6-year-old male which clustered with *DICER1*-mut ERMS of the genitourinary tract. (a) Histomorphological evaluation of this case revealed classical features of ERMS alongside foci of anaplasia. No foci of chondroid matrix were noted. (b) Subsequent targeted DNA sequencing identified a missense (p.E844X) and a RNase IIIb domain hotspot mutation of *DICER1* (p.D1709N).

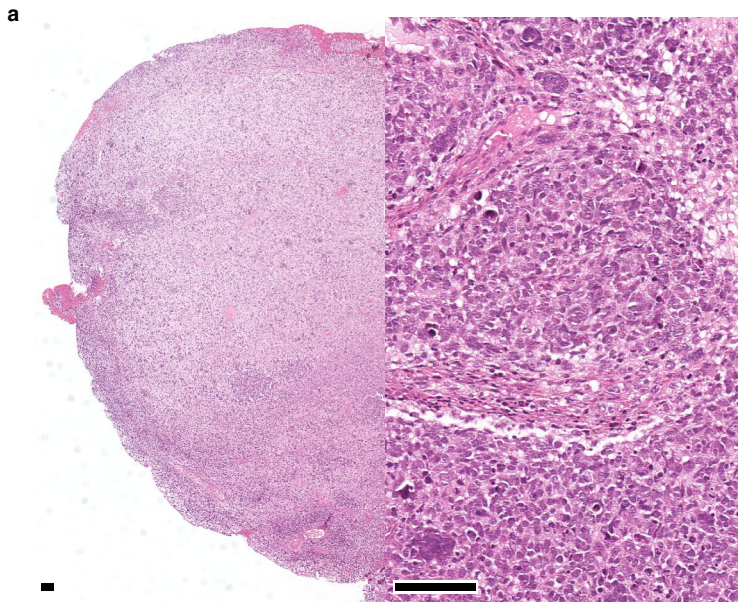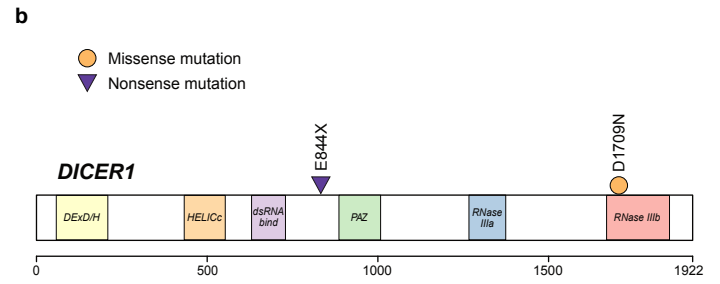

**Supplementary Table 1:** Variants called by next generation sequencing in 17 ERMS are depicted in a two-tier ranking of evidence separated in probably (red colored) clinically relevant and possible (blue colored) clinical relevance.

| ID     | Sequencing method | Material | Gene   | AA Change    | SNV Classification      | Sequencing depth | VAF  | Transcript                                             | Mutation position | Chromosome |
|--------|-------------------|----------|--------|--------------|-------------------------|------------------|------|--------------------------------------------------------|-------------------|------------|
| ERMS 1 | PANEL             | DNA_FFPE | CHD7   | M2527L       | nonsynonymous SNV       | 240              | 0,43 | CHD7:NM_017780:exon34:c.A7579C;p.M2527L                | 61769418          | 8          |
| ERMS 1 | PANEL             | DNA_FFPE | DICER1 | E1705K       | nonsynonymous SNV       | 221              | 0,87 | DICER1:NM_001271282:exon24:c.G5113A;p.E1705K           | 95560476          | 14         |
| ERMS 1 | PANEL             | DNA_FFPE | KMT2D  | 4470_4471del | frameshift deletion     | 400              | 0,18 | KMT2D:NM_003482:exon39:c.13410_13411del;p.4470_4471del | 49425077          | 12         |
| ERMS 1 | PANEL             | DNA_FFPE | KRAS   | Q61R         | nonsynonymous DNV       | 323              | 0,39 | KRAS:NM_033360:exon3:c.CA181_182GC;p.Q61R              | 25380277          | 12         |
| ERMS 2 | PANEL             | DNA_FFPE | DICER1 | T1474A       | nonsynonymous SNV       | 176              | 0,34 | DICER1:NM_001271282:exon23:c.A4420G;p.T1474A           | 95562837          | 14         |
| ERMS 2 | PANEL             | DNA_FFPE | DICER1 | D1709N       | nonsynonymous SNV       | 208              | 0,39 | DICER1:NM_001271282:exon24:c.G5125A;p.D1709N           | 95560464          | 14         |
| ERMS 2 | PANEL             | DNA_FFPE | FGFR3  | D758N        | nonsynonymous SNV       | 324              | 0,36 | FGFR3:NM_000142:exon17:c.G2272A;p.D758N                | 1808659           | 4          |
| ERMS 2 | PANEL             | DNA_FFPE | IDH2   | L385M        | nonsynonymous SNV       | 272              | 0,32 | IDH2:NM_002168:exon9:c.C1153A;p.L385M                  | 90628258          | 15         |
| ERMS 2 | PANEL             | DNA_FFPE | KRAS   | G12V         | nonsynonymous SNV       | 122              | 0,45 | KRAS:NM_033360:exon2:c.G35T;p.G12V                     | 25398284          | 12         |
| ERMS 2 | PANEL             | DNA_FFPE | NDRG2  | V51L         | nonsynonymous SNV       | 78               | 0,49 | NDRG2:NM_001282216:exon4:c.G151T;p.V51L                | 21490234          | 14         |
| ERMS 3 | PANEL             | DNA_FFPE | DICER1 | D1810Y       | nonsynonymous SNV       | 126              | 0,77 | DICER1:NM_001271282:exon25:c.G5428T;p.D1810Y           | 95557639          | 14         |
| ERMS 3 | PANEL             | DNA_FFPE | NRAS   | Y64D         | nonsynonymous SNV       | 113              | 0,14 | NRAS:NM_002524:exon3:c.T190G;p.Y64D                    | 115256521         | 1          |
| ERMS 3 | PANEL             | DNA_FFPE | TSC2   | T573A        | nonsynonymous SNV       | 294              | 0,42 | TSC2:NM_001077183:exon17:c.A1717G;p.T573A              | 2120457           | 16         |
| ERMS 4 | PANEL             | DNA_FFPE | DICER1 | D1709N       | nonsynonymous SNV       | 216              | 0,76 | DICER1:NM_001271282:exon24:c.G5125A;p.D1709N           | 95560464          | 14         |
| ERMS 4 | PANEL             | DNA_FFPE | MET    | V136I        | nonsynonymous SNV       | 190              | 0,51 | MET:NM_001127500:exon2:c.G406A;p.V136I                 | 116339544         | 7          |
| ERMS 4 | PANEL             | DNA_FFPE | TP53   | E48X         | stopgain SNV            | 207              | 0,49 | TP53:NM_001126116:exon1:c.G142T;p.E48X                 | 7578392           | 17         |
| ERMS 5 | PANEL             | DNA_FFPE | DICER1 | E1423X       | stopgain SNV            | 344              | 0,48 | DICER1:NM_001271282:exon23:c.G4267T;p.E1423X           | 95562990          | 14         |
| ERMS 5 | PANEL             | DNA_FFPE | DICER1 | E1813G       | nonsynonymous SNV       | 236              | 0,40 | DICER1:NM_001271282:exon25:c.A5438G;p.E1813G           | 95557629          | 14         |
| ERMS 6 | PANEL             | DNA_FFPE | APC    | A59G         | nonsynonymous SNV       | 159              | 0,40 | APC:NM_000038:exon3:c.C176G;p.A59G                     | 112102063         | 5          |
| ERMS 6 | PANEL             | DNA_FFPE | CDKN2C | L47H         | nonsynonymous SNV       | 169              | 0,39 | CDKN2C:NM_001262:exon3:c.T140A;p.L47H                  | 51439575          | 1          |
| ERMS 6 | PANEL             | DNA_FFPE | DICER1 | D1709N       | nonsynonymous SNV       | 269              | 0,38 | DICER1:NM_001271282:exon24:c.G5125A;p.D1709N           | 95560464          | 14         |
| ERMS 6 | PANEL             | DNA_FFPE | DICER1 | V1080fs      | frameshift substitution | 138              | 0,28 | DICER1:NM_001271282:exon20:c.3238_3239TGCTT            | 95571438          | 14         |
| ERMS 6 | PANEL             | DNA_FFPE | KMT2C  | Y987H        | nonsynonymous SNV       | 323              | 0,38 | KMT2C:NM_170606:exon18:c.T2959C;p.Y987H                | 151927025         | 7          |
| ERMS 7 | PANEL             | DNA_FFPE | BRPF3  | V1200I       | nonsynonymous SNV       | 338              | 0,37 | BRPF3:NM_015695:exon13:c.G3598A;p.V1200I               | 36198366          | 6          |
| ERMS 7 | PANEL             | DNA_FFPE | DICER1 | E1705K       | nonsynonymous SNV       | 421              | 0,25 | DICER1:NM_001271282:exon24:c.G5113A;p.E1705K           | 95560476          | 14         |
| ERMS 7 | PANEL             | DNA_FFPE | DICER1 | R1194fs      | frameshift deletion     | 115              | 0,41 | DICER1:NM_001271282:exon21:c.3580delA;p.R1194fs        | 95570153          | 14         |
| ERMS 8 | PANEL             | DNA_FFPE | DICER1 | D1810H       | nonsynonymous SNV       | 498              | 0,29 | DICER1:NM_001271282:exon25:c.G5428C;p.D1810H           | 95557639          | 14         |
| ERMS 8 | PANEL             | DNA_FFPE | DICER1 | G1136fs      | frameshift insertion    | 509              | 0,26 | DICER1:NM_001271282:exon21:c.3405dupA;p.G1136fs        | 95570327          | 14         |

|        |       |          |       |        |                  |     |      |                                            |          |    |
|--------|-------|----------|-------|--------|------------------|-----|------|--------------------------------------------|----------|----|
| ERMS 8 | PANEL | DNA_FFPE | PTCH2 | L462V  | nonsynonymousSNV | 856 | 0,33 | PTCH2:NM_003738:exon11:c.T1384G:p.L462V    | 45294734 | 1  |
| ERMS 8 | PANEL | DNA_FFPE | TSC2  | A1406V | nonsynonymousSNV | 368 | 0,45 | TSC2:NM_001114382:exon33:c.C4217T:p.A1406V | 2134509  | 16 |
| ERMS 8 | PANEL | DNA_FFPE | TSC2  | N1708K | nonsynonymousSNV | 368 | 0,49 | TSC2:NM_001114382:exon40:c.C5124A:p.N1708K | 2138260  | 16 |

|        |       |          |        |                  |                  |     |      |                                                      |           |    |
|--------|-------|----------|--------|------------------|------------------|-----|------|------------------------------------------------------|-----------|----|
| ERMS 9 | PANEL | DNA_FFPE | DICER1 | E1813A           | nonsynonymousSNV | 182 | 0,11 | DICER1:NM_001271282:exon21:c.A5438C:p.E1813A         | 95557629  | 14 |
| ERMS 9 | PANEL | DNA_FFPE | KMT2C  | Y816_I817delinsX | stopgain SNV     | 230 | 0,33 | KMT2C:NM_170606:exon14:c.2447dupA:p.Y816_I817delinsX | 151945071 | 7  |

|         |       |          |       |        |                  |     |      |                                                  |           |    |
|---------|-------|----------|-------|--------|------------------|-----|------|--------------------------------------------------|-----------|----|
| ERMS 10 | EXOME | DNA_FFPE | KMT2B | G1179R | nonsynonymousSNV | 285 | 0,26 | KMT2B:ENST00000301067.7:exon11:c.G3535C:p.G1179R | 49443836  | 12 |
| ERMS 10 | EXOME | DNA_kryo | NRAS  | Q61K   | nonsynonymousSNV | 110 | 0,54 | NRAS:ENST00000369535.4:exon3:c.C181A:p.Q61K      | 115256530 | 1  |

|         |       |          |      |       |          |     |      |                                              |         |    |
|---------|-------|----------|------|-------|----------|-----|------|----------------------------------------------|---------|----|
| ERMS 11 | EXOME | DNA_kryo | TP53 | R196X | stopgain | 193 | 0,93 | TP53:ENST00000359597.4:exon5:c.C586T:p.R196X | 7578263 | 17 |
|---------|-------|----------|------|-------|----------|-----|------|----------------------------------------------|---------|----|

|         |       |          |        |                   |                            |      |      |                                                        |           |    |
|---------|-------|----------|--------|-------------------|----------------------------|------|------|--------------------------------------------------------|-----------|----|
| ERMS 12 | PANEL | DNA_FFPE | GSE1   | R763Q             | nonsynonymousSNV           | 462  | 0,25 | GSE1:NM_001278184:exon10:c.G2288A:p.R763Q              | 85697083  | 16 |
| ERMS 12 | PANEL | DNA_FFPE | KMT2C  | Y987H             | nonsynonymousSNV           | 333  | 0,33 | KMT2C:NM_170606:exon18:c.T2959C:p.Y987H                | 151927025 | 7  |
| ERMS 12 | PANEL | DNA_FFPE | KMT2C  | T316S             | nonsynonymousSNV           | 396  | 0,61 | KMT2C:NM_170606:exon7:c.A946T:p.T316S                  | 151970856 | 7  |
| ERMS 12 | PANEL | DNA_FFPE | PDGFRA | N33Y              | nonsynonymousSNV           | 470  | 0,25 | PDGFRA:NM_006206:exon3:c.A97T:p.N33Y                   | 55127309  | 4  |
| ERMS 12 | PANEL | DNA_FFPE | PIK3CG | 972_981GCTGGTGGAC | nonframeshift substitution | 1201 | 0,76 | PIK3CG:NM_001282427:exon2:c.972_981GCTGGTGGAC          | 106508978 | 7  |
| ERMS 12 | PANEL | DNA_FFPE | TP53   | R141C             | nonsynonymousSNV           | 164  | 0,45 | TP53:NM_001126116:exon4:c.C421T:p.R141C                | 7577121   | 17 |
| ERMS 12 | PANEL | DNA_FFPE | TSC2   | 1485_1486del      | nonframeshift deletion     | 1142 | 0,21 | TSC2:NM_001114382:exon34:c.4455_4457del:p.1485_1486del | 2134982   | 16 |

|         |       |          |        |       |                  |     |      |                                          |           |   |
|---------|-------|----------|--------|-------|------------------|-----|------|------------------------------------------|-----------|---|
| ERMS 13 | PANEL | DNA_FFPE | BRAF   | V600E | nonsynonymousSNV | 107 | 0,25 | BRAF:NM_004333:exon15:c.T1799A:p.V600E   | 140453136 | 7 |
| ERMS 13 | PANEL | DNA_FFPE | PDGFRA | S851L | nonsynonymousSNV | 113 | 0,28 | PDGFRA:NM_006206:exon18:c.C2552T:p.S851L | 55152120  | 4 |

|         |       |          |        |                   |                            |      |      |                                                      |           |   |
|---------|-------|----------|--------|-------------------|----------------------------|------|------|------------------------------------------------------|-----------|---|
| ERMS 14 | PANEL | DNA_FFPE | DDR1   | P556L             | nonsynonymousSNV           | 315  | 0,57 | DDR1:NM_013994:exon12:c.C1667T:p.P556L               | 30864440  | 6 |
| ERMS 14 | PANEL | DNA_FFPE | KMT2C  | Y816_I817delinsX  | stopgain SNV               | 1190 | 0,21 | KMT2C:NM_170606:exon14:c.2447dupA:p.Y816_I817delinsX | 151945071 | 7 |
| ERMS 14 | PANEL | DNA_FFPE | PIK3CG | 972_981GCTGGTGGAC | nonframeshift substitution | 1148 | 0,66 | PIK3CG:NM_001282427:exon2:c.972_981GCTGGTGGAC        | 106508978 | 7 |
| ERMS 14 | PANEL | DNA_FFPE | PLCH1  | L1574R            | nonsynonymousSNV           | 397  | 0,51 | PLCH1:NM_001130960:exon23:c.T4721G:p.L1574R          | 155199118 | 3 |

|         |       |          |     |        |          |     |      |                                                |          |    |
|---------|-------|----------|-----|--------|----------|-----|------|------------------------------------------------|----------|----|
| ERMS 15 | EXOME | DNA_kryo | NF1 | Y1604X | stopgain | 107 | 0,46 | NF1:ENST00000356175.3:exon36:c.C4812G:p.Y1604X | 29652877 | 17 |
|---------|-------|----------|-----|--------|----------|-----|------|------------------------------------------------|----------|----|

|         |       |          |       |       |                  |    |      |                                                |          |    |
|---------|-------|----------|-------|-------|------------------|----|------|------------------------------------------------|----------|----|
| ERMS 16 | EXOME | DNA_kryo | ERBB2 | E363K | nonsynonymousSNV | 42 | 0,31 | ERBB2:ENST00000269571.5:exon9:c.G1087A:p.E363K | 37868640 | 17 |
|---------|-------|----------|-------|-------|------------------|----|------|------------------------------------------------|----------|----|

**Supplementary Table 2:** DNA methylation data set including ARMS (n = 43), MYOD1-mutant SRMS (n = 12), ERMS (n = 39) and non-neoplastic striated muscle tissue (control; n = 8).

| Diagnosis                        | Age group     | Gender | SITE                | Site                                                         | Previously reported |
|----------------------------------|---------------|--------|---------------------|--------------------------------------------------------------|---------------------|
| ARMS                             | 10 -19 years  | m      | extra genitourinary | Intracranial                                                 | Kölsche et al. (29) |
| ARMS                             | < 10 years    | f      | extra genitourinary | Lower extremity                                              | -                   |
| ARMS                             | 20 - 39 years | m      | extra genitourinary | Lymph node                                                   | Kölsche et al. (29) |
| ARMS                             | < 10 years    | f      | NA                  | NA                                                           | Kölsche et al. (29) |
| ARMS                             | < 10 years    | m      | NA                  | NA                                                           | Kölsche et al. (29) |
| ARMS                             | NA            | NA     | NA                  | NA                                                           | Kölsche et al. (29) |
| ARMS                             | 10 -19 years  | f      | extra genitourinary | Soft tissue, trunk, thorax, paraspinal                       | Kölsche et al. (29) |
| ARMS                             | 20 - 39 years | m      | extra genitourinary | Soft tissue, head and neck, nasopharynx                      | Kölsche et al. (29) |
| ARMS                             | 10 -19 years  | m      | extra genitourinary | Soft tissue, head and neck, neck, lymph node                 | Kölsche et al. (29) |
| ARMS                             | 10 -19 years  | m      | extra genitourinary | Soft tissue, head and neck, tracheal region                  | Kölsche et al. (29) |
| ARMS                             | < 10 years    | m      | extra genitourinary | Soft tissue, limbs                                           | Kölsche et al. (29) |
| ARMS                             | < 10 years    | f      | extra genitourinary | Soft tissue, limbs                                           | Kölsche et al. (29) |
| ARMS                             | 10 -19 years  | f      | extra genitourinary | Soft tissue, limbs                                           | Kölsche et al. (29) |
| ARMS                             | 20 - 39 years | f      | extra genitourinary | Soft tissue, limbs, lower limbs, foot                        | Kölsche et al. (29) |
| ARMS                             | < 10 years    | f      | extra genitourinary | Soft tissue, limbs, lower limbs, gluteal region              | Kölsche et al. (29) |
| ARMS                             | < 10 years    | f      | extra genitourinary | Soft tissue, limbs, lower limbs, groin                       | Kölsche et al. (29) |
| ARMS                             | < 10 years    | m      | extra genitourinary | Soft tissue, limbs, lower limbs, groin, lymph node           | Kölsche et al. (29) |
| ARMS                             | 10 -19 years  | m      | extra genitourinary | Soft tissue, limbs, lower limbs, leg                         | Kölsche et al. (29) |
| ARMS                             | < 10 years    | f      | extra genitourinary | Soft tissue, limbs, lower limbs, thigh                       | Kölsche et al. (29) |
| ARMS                             | 10 -19 years  | f      | extra genitourinary | Soft tissue, limbs, upper limbs, arm                         | Kölsche et al. (29) |
| ARMS                             | 10 -19 years  | f      | extra genitourinary | Soft tissue, limbs, upper limbs, axilla                      | Kölsche et al. (29) |
| ARMS                             | < 10 years    | m      | extra genitourinary | Soft tissue, limbs, upper limbs, hand                        | Kölsche et al. (29) |
| ARMS                             | 10 -19 years  | m      | extra genitourinary | Soft tissue, limbs, upper limbs, shoulder girdle, lymph node | Kölsche et al. (29) |
| ARMS                             | 10 -19 years  | m      | extra genitourinary | Soft tissue, trunk, abdomen, lymph node                      | Kölsche et al. (29) |
| ARMS                             | 20 - 39 years | m      | extra genitourinary | Soft tissue, trunk, abdomen                                  | Kölsche et al. (29) |
| ARMS                             | 10 -19 years  | m      | extra genitourinary | Soft tissue, trunk, buttock                                  | Kölsche et al. (29) |
| ARMS                             | 10 -19 years  | f      | genitourinary       | Soft tissue, trunk, pelvis, bladder wall                     | Kölsche et al. (29) |
| ARMS                             | 10 -19 years  | m      | genitourinary       | Soft tissue, trunk, pelvis, genital                          | Kölsche et al. (29) |
| ARMS                             | 20 - 39 years | m      | genitourinary       | Soft tissue, trunk, pelvis, genital                          | Kölsche et al. (29) |
| ARMS                             | 20 - 39 years | m      | genitourinary       | Soft tissue, trunk, pelvis, genital                          | Kölsche et al. (29) |
| ARMS                             | < 10 years    | f      | extra genitourinary | Soft tissue, trunk, retroperitoneum                          | Kölsche et al. (29) |
| ARMS                             | < 10 years    | m      | extra genitourinary | Soft tissue, trunk, thoracic wall                            | Kölsche et al. (29) |
| ARMS                             | 10 -19 years  | f      | extra genitourinary | Soft tissue, trunk, thorax, mamma                            | Kölsche et al. (29) |
| ARMS                             | < 10 years    | f      | extra genitourinary | Soft tissue, trunk, thorax, mediastinum                      | Kölsche et al. (29) |
| ARMS                             | 20 - 39 years | m      | extra genitourinary | Visceral, thorax, lung                                       | Kölsche et al. (29) |
| ARMS                             | 10 -19 years  | m      | extra genitourinary | Visceral, thorax, pleura                                     | Kölsche et al. (29) |
| ARMS                             | 10 -19 years  | f      | extra genitourinary | Visceral, thorax, pleura                                     | Kölsche et al. (29) |
| ARMS                             | 10 -19 years  | m      | extra genitourinary | Soft tissue, limbs, lower limbs, leg                         | -                   |
| ARMS                             | < 10 years    | f      | extra genitourinary | Soft tissue, trunk, abdomen                                  | -                   |
| ARMS                             | 10 -19 years  | m      | extra genitourinary | Soft tissue, limbs, lower limbs                              | -                   |
| ARMS                             | < 10 years    | m      | extra genitourinary | Orbita                                                       | -                   |
| ARMS                             | < 10 years    | m      | extra genitourinary | Soft tissue, limbs, lower limbs, gluteal region              | -                   |
| ARMS                             | < 10 years    | m      | extra genitourinary | Buccal                                                       | -                   |
| Control (striated muscle tissue) | > 40 years    | m      | extra genitourinary | Soft tissue, limbs                                           | Kölsche et al. (29) |
| Control (striated muscle tissue) | > 40 years    | m      | extra genitourinary | Soft tissue, limbs, lower limbs, leg                         | Kölsche et al. (29) |
| Control (striated muscle tissue) | 20 - 39 years | m      | extra genitourinary | Soft tissue, limbs, lower limbs, thigh                       | Kölsche et al. (29) |
| Control (striated muscle tissue) | 20 - 39 years | m      | extra genitourinary | Soft tissue, limbs, lower limbs, thigh                       | Kölsche et al. (29) |
| Control (striated muscle tissue) | > 40 years    | m      | extra genitourinary | Soft tissue, limbs, lower limbs, thigh                       | Kölsche et al. (29) |
| Control (striated muscle tissue) | > 40 years    | m      | extra genitourinary | Soft tissue, limbs, lower limbs, thigh                       | Kölsche et al. (29) |
| Control (striated muscle tissue) | > 40 years    | m      | extra genitourinary | Soft tissue, limbs, upper limbs, forearm                     | Kölsche et al. (29) |

|                                  |             |    |                     |                                          |                     |
|----------------------------------|-------------|----|---------------------|------------------------------------------|---------------------|
| Control (striated muscle tissue) | >40 years   | f  | extra genitourinary | Soft tissue, limbs, upper limbs, forearm | Kölsche et al. (29) |
| ERMS ( <i>DICER1</i> -mut)       | <10 years   | m  | extra genitourinary | Maxillary                                | -                   |
| ERMS                             | <10 years   | f  | genitourinary       | Bladder                                  | -                   |
| ERMS                             | <10 years   | m  | extra genitourinary | Intracranial                             | Kölsche et al. (29) |
| ERMS                             | <10 years   | m  | NA                  | NA                                       | Kölsche et al. (29) |
| ERMS                             | 10-19 years | m  | NA                  | NA                                       | Kölsche et al. (29) |
| ERMS                             | <10 years   | m  | extra genitourinary | Orbita                                   | -                   |
| ERMS                             | <10 years   | m  | extra genitourinary | Soft tissue, head and neck, oral cavity  | Kölsche et al. (29) |
| ERMS                             | <10 years   | m  | extra genitourinary | Soft tissue, head and neck, orbit        | Kölsche et al. (29) |
| ERMS                             | 10-19 years | m  | extra genitourinary | Soft tissue, head and neck, orbit        | Kölsche et al. (29) |
| ERMS                             | <10 years   | m  | extra genitourinary | Soft tissue, trunk, abdomen              | Kölsche et al. (29) |
| ERMS                             | <10 years   | f  | extra genitourinary | Soft tissue, trunk, abdomen              | Kölsche et al. (29) |
| ERMS                             | <10 years   | m  | extra genitourinary | Soft tissue, trunk, abdomen              | Kölsche et al. (29) |
| ERMS                             | 20-39 years | f  | extra genitourinary | Soft tissue, trunk, abdomen              | Kölsche et al. (29) |
| ERMS                             | <10 years   | f  | extra genitourinary | Soft tissue, trunk, abdomen              | Kölsche et al. (29) |
| ERMS                             | <10 years   | m  | extra genitourinary | Soft tissue, trunk, pelvis               | Kölsche et al. (29) |
| ERMS                             | 20-39 years | f  | extra genitourinary | Soft tissue, trunk, pelvis               | Kölsche et al. (29) |
| ERMS                             | <10 years   | m  | genitourinary       | Soft tissue, trunk, pelvis, bladder wall | Kölsche et al. (29) |
| ERMS                             | 10-19 years | m  | genitourinary       | Soft tissue, trunk, pelvis, genital      | Kölsche et al. (29) |
| ERMS                             | 10-19 years | m  | genitourinary       | Soft tissue, trunk, pelvis, genital      | Kölsche et al. (29) |
| ERMS                             | 10-19 years | m  | genitourinary       | Soft tissue, trunk, pelvis, genital      | Kölsche et al. (29) |
| ERMS                             | 10-19 years | m  | genitourinary       | Soft tissue, trunk, pelvis, genital      | Kölsche et al. (29) |
| ERMS                             | 10-19 years | m  | genitourinary       | Soft tissue, trunk, pelvis, genital      | Kölsche et al. (29) |
| ERMS                             | 10-19 years | m  | genitourinary       | Soft tissue, trunk, pelvis, genital      | Kölsche et al. (29) |
| ERMS                             | 20-39 years | m  | genitourinary       | Soft tissue, trunk, pelvis, genital      | Kölsche et al. (29) |
| ERMS                             | 20-39 years | m  | genitourinary       | Soft tissue, trunk, pelvis, genital      | Kölsche et al. (29) |
| ERMS                             | <10 years   | m  | extra genitourinary | Soft tissue, trunk, retroperitoneum      | Kölsche et al. (29) |
| ERMS                             | <10 years   | m  | extra genitourinary | Visceral, abdomen, small intestine       | Kölsche et al. (29) |
| ERMS                             | 10-19 years | m  | extra genitourinary | Visceral, thorax, lung                   | Kölsche et al. (29) |
| ERMS                             | <10 years   | m  | genitourinary       | Prostate                                 | -                   |
| ERMS                             | <10 years   | f  | extra genitourinary | Orbita                                   | -                   |
| ERMS                             | <10 years   | m  | genitourinary       | Paratesticular                           | -                   |
| ERMS                             | <10 years   | m  | genitourinary       | Prostate                                 | -                   |
| ERMS                             | <10 years   | m  | genitourinary       | Prostate                                 | -                   |
| ERMS                             | <10 years   | m  | extra genitourinary | Parapharyngeal                           | -                   |
| ERMS                             | <10 years   | m  | genitourinary       | Paratesticular                           | -                   |
| ERMS                             | <10 years   | m  | extra genitourinary | Orbita                                   | -                   |
| ERMS                             | 10-19 years | f  | extra genitourinary | Ear canal                                | -                   |
| ERMS                             | <10 years   | f  | genitourinary       | Paravesicular                            | -                   |
| ERMS                             | <10 years   | m  | extra genitourinary | Soft tissue, trunk, abdomen              | -                   |
| MYOD1-mut SRMS                   | 10-19 years | m  | extra genitourinary | Bone, head and neck                      | Kölsche et al. (29) |
| MYOD1-mut SRMS                   | <10 years   | m  | extra genitourinary | Bone, spine                              | Kölsche et al. (29) |
| MYOD1-mut SRMS                   | 20-39 years | f  | extra genitourinary | Intracranial, leptomeningeal             | Kölsche et al. (29) |
| MYOD1-mut SRMS                   | 20-39 years | f  | extra genitourinary | Lymph node                               | Kölsche et al. (29) |
| MYOD1-mut SRMS                   | NA          | NA | NA                  | NA                                       | Kölsche et al. (29) |
| MYOD1-mut SRMS                   | NA          | NA | NA                  | NA                                       | Kölsche et al. (29) |
| MYOD1-mut SRMS                   | NA          | NA | NA                  | NA                                       | Kölsche et al. (29) |
| MYOD1-mut SRMS                   | NA          | NA | NA                  | NA                                       | Kölsche et al. (29) |
| MYOD1-mut SRMS                   | NA          | NA | NA                  | NA                                       | Kölsche et al. (29) |
| MYOD1-mut SRMS                   | >40 years   | m  | extra genitourinary | Soft tissue, head and neck, head         | Kölsche et al. (29) |
| MYOD1-mut SRMS                   | 10-19 years | f  | extra genitourinary | Soft tissue, head and neck, neck         | Kölsche et al. (29) |
| MYOD1-mut SRMS                   | 10-19 years | m  | extra genitourinary | Soft tissue, trunk, thorax               | Kölsche et al. (29) |
